# Supplementary material for: Pore-opening mechanism in trimeric P2X receptor channels
Source: PubMed Central journal article supplement — Nat Commun. 2010 Jul 27;1(4):1–7. doi: 10.1038/ncomms1048 (PMC2982178; doi:10.1038/ncomms1048), 2010-07-27
Supplement: ncomms1048-s1.pdf [file ncomms1048-s1.pdf]

## Pore-opening mechanism in trimeric P2X receptor channels

Mufeng Li, Toshimitsu Kawate, Shai D. Silberberg and Kenton J. Swartz

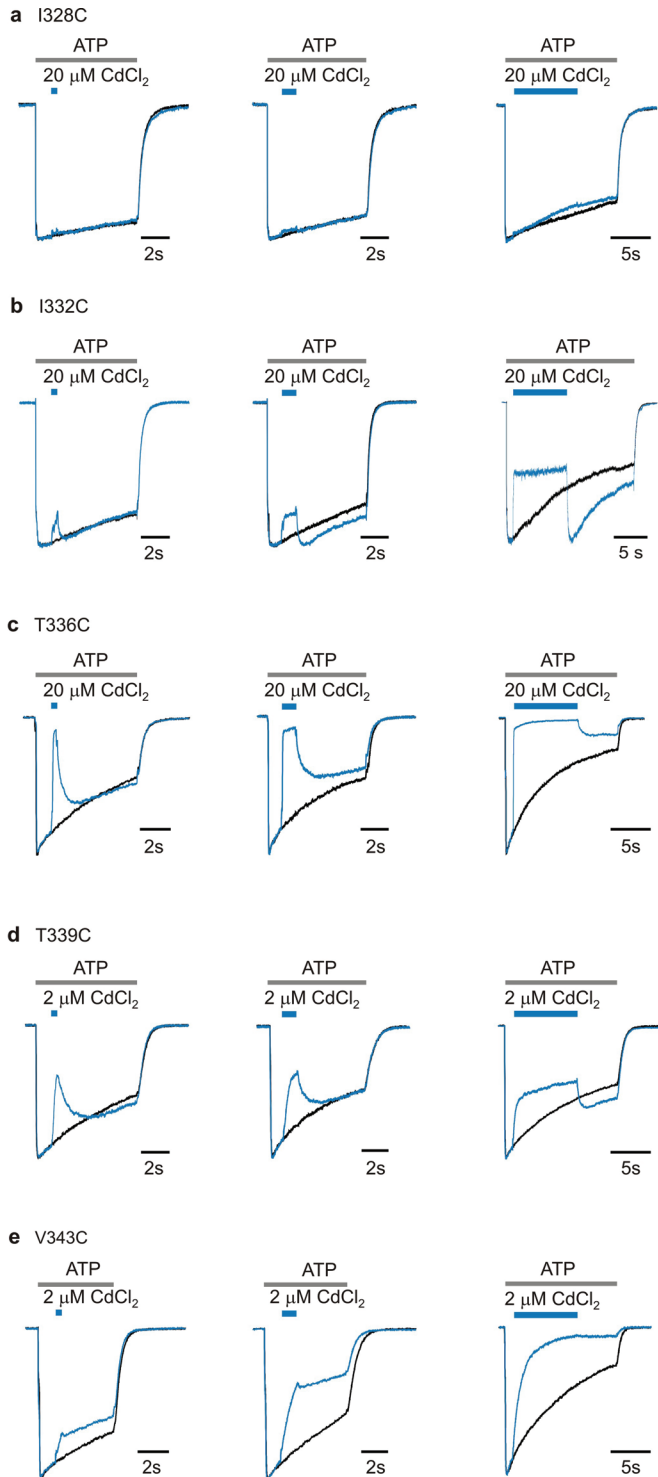

### Supplementary Figure S1| Effects of extracellular Cd<sup>2+</sup> on Cys mutants in TM2.

Black current traces show ATP-activated currents under control conditions, while those in blue show the effects of external Cd<sup>2+</sup> application in the presence of ATP. Blue traces have been scaled to superimpose with control traces in black. Cd<sup>2+</sup> was applied for 300 ms (left panel), 1 s (middle panel) or 8 s (right panel). **a)** I328C was insensitive to extracellular Cd<sup>2+</sup>. **b and d)** I332C and T339C currents were rapidly inhibited by Cd<sup>2+</sup>, and the inhibition could be reversed rapidly after removing the metal from the external solution. At both of these positions, longer Cd<sup>2+</sup> application seem to prevent current desensitization.

**c)** T336C current was inhibited by Cd<sup>2+</sup>, and the inhibition recovered rapidly if Cd<sup>2+</sup> was applied for only 300 ms. Longer Cd<sup>2+</sup> application resulted in stable coordination as indicated by a fraction of current that recovers slowly. Under control conditions, substantial desensitization occurs during long ATP applications, suggesting that stable coordination of Cd<sup>2+</sup> may occur in a desensitized state. **e)** V343C currents were inhibited by Cd<sup>2+</sup> regardless of the application time, and the inhibition recovered slowly after removing Cd<sup>2+</sup>. Saturating ATP concentrations (30 or 100  $\mu$ M) were used in these experiments. Similar results were observed in 4 to 6 different experiments.

## Pore-opening mechanism in trimeric P2X receptor channels

Mufeng Li, Toshimitsu Kawate, Shai D. Silberberg and Kenton J. Swartz

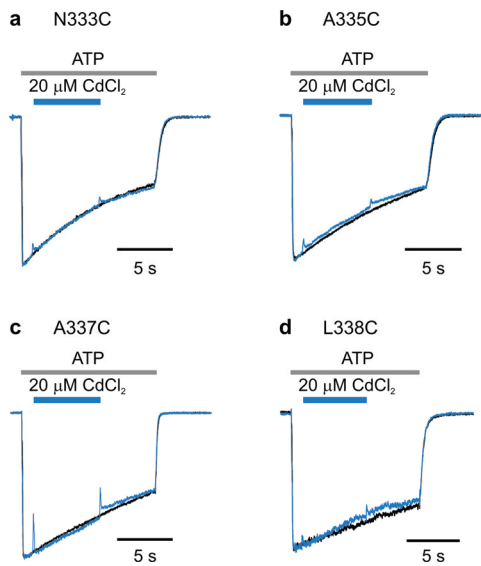

### Supplementary Figure S2| Extracellular $\text{Cd}^{2+}$ has no effect on four Cys mutants in the external region of TM2.

Black current traces show ATP-activated currents under control conditions, while those in blue show the effects of external  $\text{Cd}^{2+}$  application in the presence of ATP. Blue traces have been scaled to superimpose with control traces in black. Saturating concentrations of ATP (30 to 100  $\mu\text{M}$ ) were used in each case, and similar results were obtained in 4 different experiments.

## Pore-opening mechanism in trimeric P2X receptor channels

Mufeng Li, Toshimitsu Kawate, Shai D. Silberberg and Kenton J. Swartz

### V343C

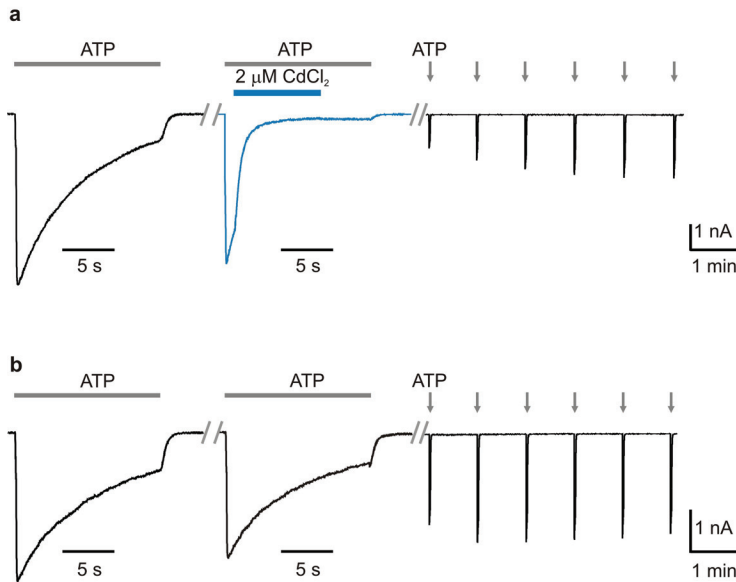

### Supplementary Figure S3| Recovery of V343C and S345C channels after removal of external Cd<sup>2+</sup>.

**a) and c)** ATP (100 μM) was first applied alone as a control, and then Cd<sup>2+</sup> was applied for 8 sec. during a second ATP application (given 2 min later). Subsequent ATP applications were given every minute, beginning 1 min after the second ATP application. Similar results were obtained in 4 different experiments. **b) and d)** Control experiments using the same protocol as in a) but without Cd<sup>2+</sup> application.

### S345C

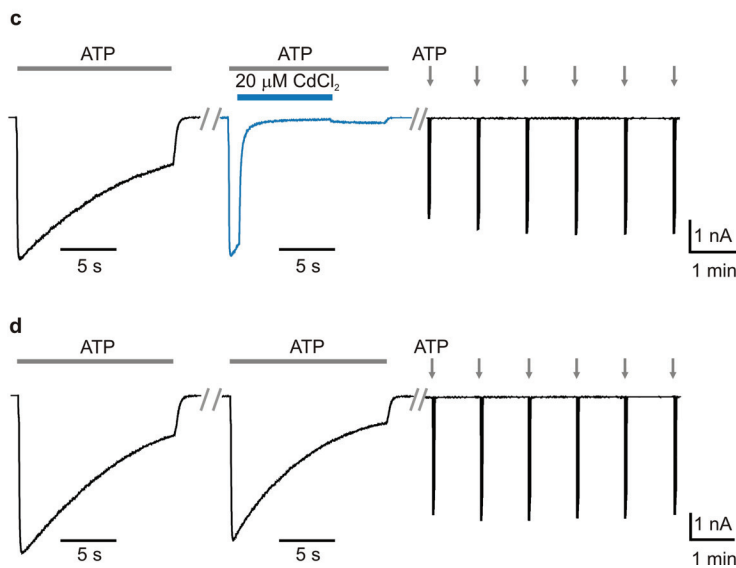

## Pore-opening mechanism in trimeric P2X receptor channels

Mufeng Li, Toshimitsu Kawate, Shai D. Silberberg and Kenton J. Swartz

**a** 343 (1C+2V)

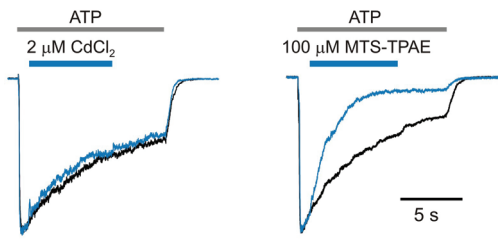

**b** 343 (2C+1V)

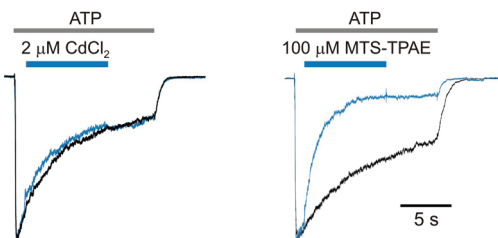

**c** 343 (3C)

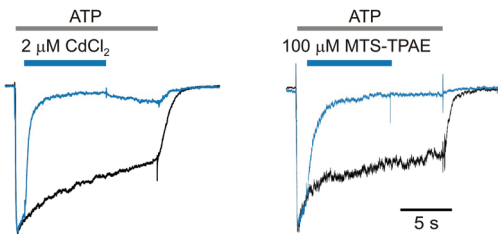

### Supplementary Figure S4| Effects of extracellular Cd<sup>2+</sup> and MTS-TPAE on concatamers containing one to three Cys substitutions at position V343.

Black current traces show ATP-activated currents under control conditions, while those in blue show the effects of external Cd<sup>2+</sup> application in the presence of ATP. Blue traces have been scaled to superimpose with control traces in black.

**a)** A trimeric concatamer with 1 Cys and 2 Val at 343 is insensitive to 2  $\mu\text{M}$  Cd<sup>2+</sup>, but can be inhibited by 100  $\mu\text{M}$  MTS-TPAE (with a modification rate of  $4.8 \pm 0.4 \times 10^4 \text{ M}^{-1} \text{ s}^{-1}$ ), indicating that the Cys mutation is accessible.

**b)** A concatamer with 2 Cys and 1 Val at 343 is insensitive to 2  $\mu\text{M}$  Cd<sup>2+</sup>, but can be inhibited by 100  $\mu\text{M}$  MTS-TPAE with a modification rate of  $5.9 \pm 0.6 \times 10^4 \text{ M}^{-1} \text{ s}^{-1}$ . **c)** A concatamer with 3 Cys at 343 is inhibited by applying either 2  $\mu\text{M}$  Cd<sup>2+</sup> or 100  $\mu\text{M}$  MTS-TPAE (with a modification rate of  $1.1 \pm 0.1 \times 10^5 \text{ M}^{-1} \text{ s}^{-1}$ ). Saturating concentrations of ATP (30  $\mu\text{M}$ ) were used in each case, and similar results were obtained in 4 different experiments.
